# Supplementary material for: COVID-19 Mortality by Race and Ethnicity in US Metropolitan and Nonmetropolitan Areas, March 2020 to February 2022
Source: PubMed Central journal article supplement (PMC10155069; doi:10.1001/jamanetworkopen.2023.11098), 2023-05-02
Supplement: jamanetwopen-e2311098-s002.pdf [file jamanetwopen-e2311098-s002.pdf]

## Data Sharing Statement

Lundberg. COVID-19 Mortality by Race and Ethnicity in US Metropolitan and Nonmetropolitan Areas, March 2020 to February 2022. *JAMA Netw Open*. Published online May 2, 2023. doi:10.1001/jamanetworkopen.2023.11098

### Data

**Data available:** No

### Additional Information

**Explanation for why data not available:** COVID-19 mortality data used in the study are publicly available and can be accessed via the Centers for Disease Control and Prevention (CDC) WONDER online database. Population data used in the study are publicly available from the U.S. Census Bureau. Additional details about the data and programming code for replication can be accessed at the linked GitHub repository: <https://github.com/The-Uncounted-Lab/covid-race-metro/>.
